# Supplementary material for: Penetration of Nanobody-Dextran Polymer Conjugates through Tumor Spheroids
Source: MDPI journal article supplement (doi:10.3390/pharmaceutics15102374), 2023-09-22
Supplement: s1 [file s1]

# Penetration of Nanobody-Dextran Polymer Conjugates through Tumor Spheroids

Peter Bitsch <sup>1,†</sup>, Eva S. Baum <sup>2,†</sup>, Irati Beltrán Hernández <sup>2,3</sup>, Sebastian Bitsch <sup>1</sup>, Jakob Harwood <sup>1</sup>, Sabrina Oliveira <sup>2,3,\*</sup>, and Harald Kolmar <sup>1,4,\*</sup>

<sup>1</sup> Institute for Organic Chemistry and Biochemistry, Technical University of Darmstadt, Peter-Grünberg-Str. 4, 64287 Darmstadt, Germany

<sup>2</sup> Cell Biology, Neurobiology and Biophysics, Department of Biology, Faculty of Science, Utrecht University, Padualaan 8, 3584 CH Utrecht, The Netherlands

<sup>3</sup> Pharmaceutics, Department of Pharmaceutical Sciences, Faculty of Science, Utrecht University, Universiteitsweg 99, 3584 CG Utrecht, The Netherlands

<sup>4</sup> Centre of Synthetic Biology, Technical University of Darmstadt.

\* Correspondence: s.oliveira@uu.nl (S.O.); harald.kolmar@tu-darmstadt.de (H.K.)

† These authors contributed equally to this work.

## Table of contents

|      |                                                                                           |    |
|------|-------------------------------------------------------------------------------------------|----|
| 1.   | Synthesis of compounds.....                                                               | 2  |
| 1.1. | Synthesis of cadaverine-azide linker.....                                                 | 2  |
| 1.2. | Synthesis of dextran- <i>N</i> -Boc-cadaverine.....                                       | 3  |
| 1.3. | Carboxyethylation of dextran .....                                                        | 4  |
| 1.4. | Synthesis of N <sub>3</sub> -dextran- <i>N</i> -Boc-cadaverine.....                       | 6  |
| 1.5. | Synthesis of BCN-IRDye700DX .....                                                         | 9  |
| 1.6. | Structural formulas of utilized labels.....                                               | 10 |
| 1.7. | Generation of dextraknobs .....                                                           | 11 |
| 2.   | Supplementary figures cell assays .....                                                   | 12 |
| 2.1. | Cellular binding assays.....                                                              | 12 |
| 2.2. | Confocal microscopy of spheroids .....                                                    | 13 |
| 2.3. | ..... Nanobody-targeted photodynamic therapy (in vitro) on 2D monolayer cell culture..... | 14 |
| 2.4. | NB-targeted PDT on 3D spheroid cell culture.....                                          | 16 |

## 1. Synthesis of compounds

### 1.1. Synthesis of cadaverine-azide linker

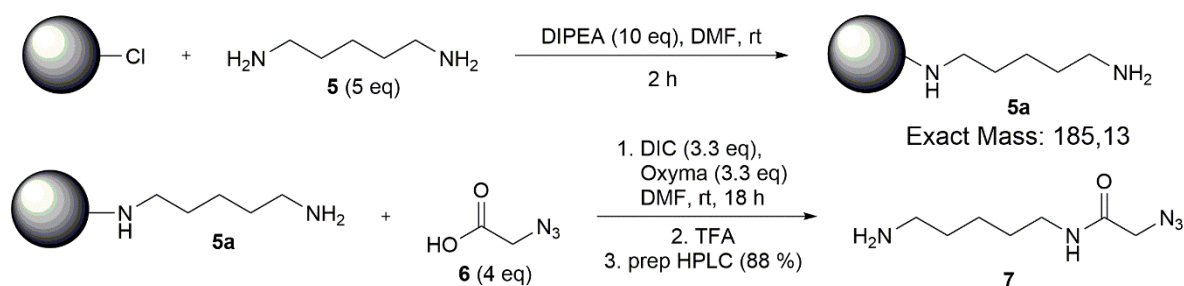

**Scheme S 1.** Synthesis of the N<sub>3</sub>-Cad-Linker (*N*-(aminopentyl)-2-azidoacetamide).

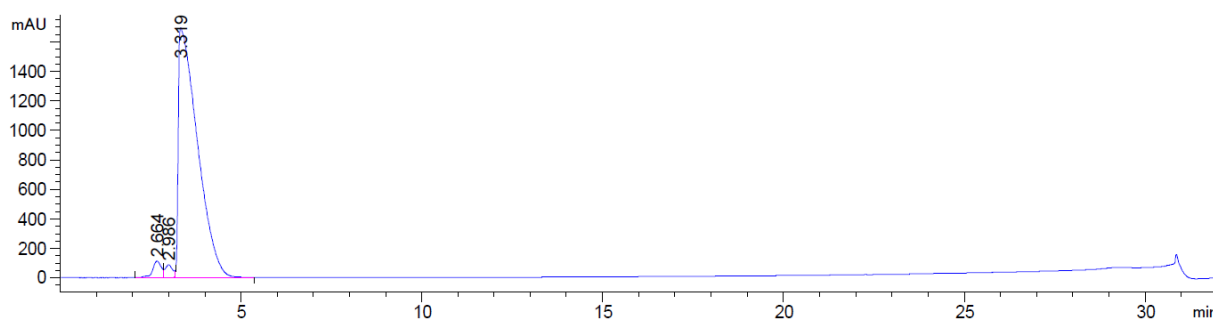

**Figure S 1.** HPLC-diagram of the N<sub>3</sub>-Cad-Linker (0to80 % Eluent B, 220 nm).

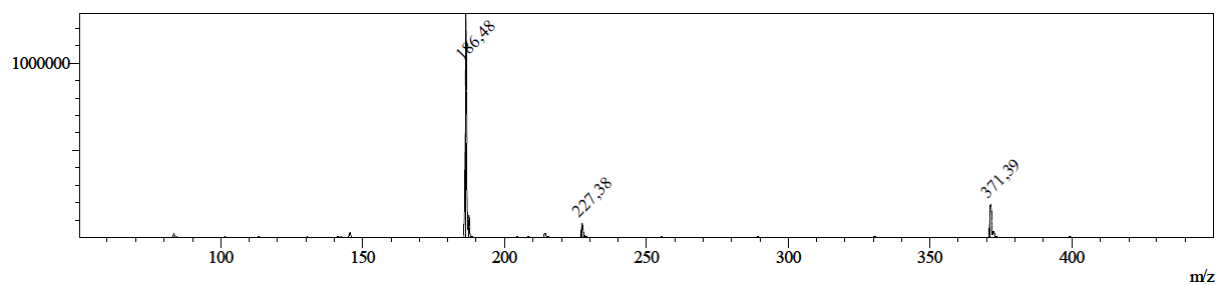

**Figure S 2.** LC-MS spectrum of the N<sub>3</sub>-Cad-Linker (exact mass = 185.13 m/z). As method, a gradient from 10to100 % Eluent B was used over 20 min with a flow rate of 0.7 mL/s.

## 1.2. Synthesis of dextran-*N*-Boc-cadaverine

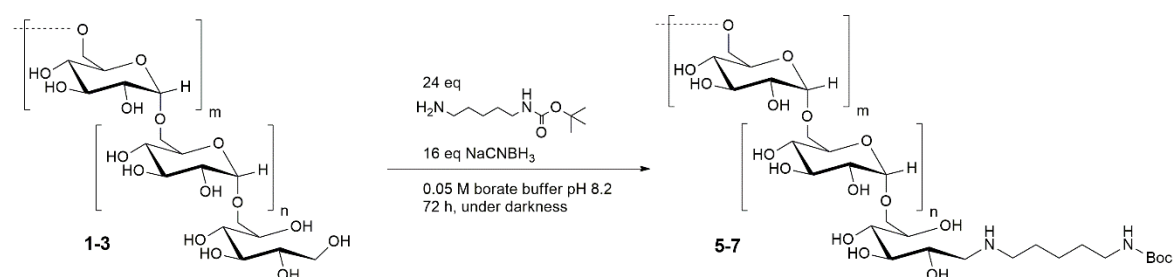

**Scheme S 2.** Reductive amination of dextran with *N*-Boc-cadaverine.

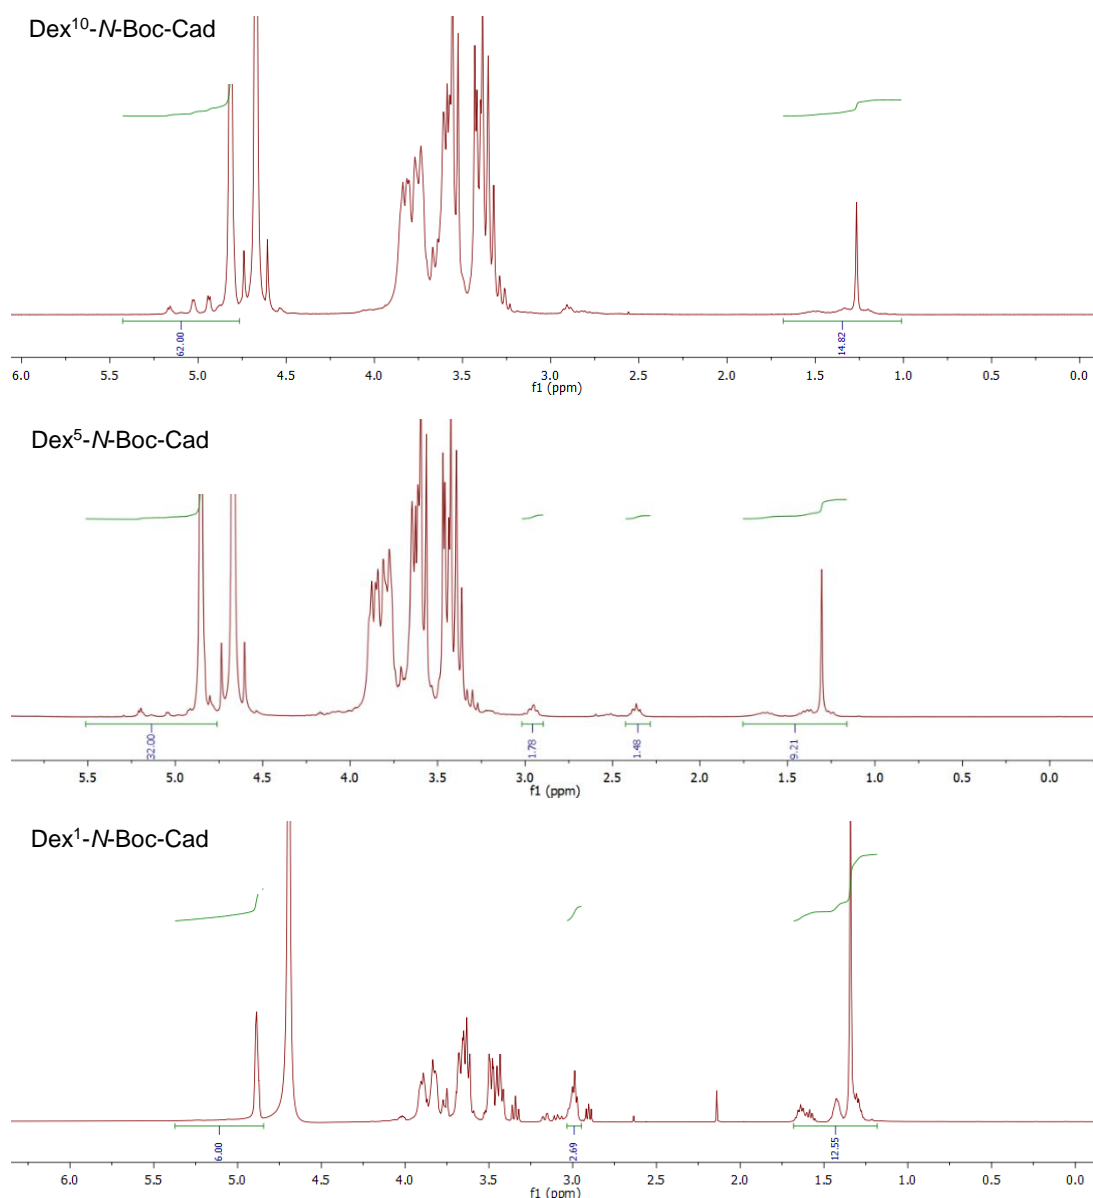

**Figure S 3.** <sup>1</sup>H-NMR spectra of Dex-*N*-Boc-Cad variants. <sup>1</sup>H-NMR (300 MHz, deuterium oxide) δ = 5.36 – 4.80 (m, 1 H, C(1)H), 4.20 – 3.22 (m, C(2-6)H (glucose units)), 3.05 – 2.81 (m, 4 H, CH<sub>2</sub>NH-Boc, CH<sub>2</sub>(CH<sub>2</sub>)<sub>4</sub>NHBoc), 1.73 – 1.19 (overlapped m, 15H, CH<sub>2</sub>(CH<sub>2</sub>)<sub>3</sub>NH-Boc, CH<sub>2</sub>(CH<sub>2</sub>)<sub>2</sub>NH-Boc, CH<sub>2</sub>(CH<sub>2</sub>)<sub>1</sub>NH-Boc, 3 CH<sub>3</sub>(Boc)) ppm.

### 1.3. Carboxyethylation of dextran

**Table S 1.** Calculated CE-ratios per dextran.

| compound                       | CE-groups<br>per dextran | Yield<br>[%] |
|--------------------------------|--------------------------|--------------|
| 2-CED <sup>10</sup> -N-Boc-Cad | 2.4                      | 65           |
| 2-CED <sup>5</sup> -N-Boc-Cad  | 2.4                      | 73           |
| 2-CED <sup>1</sup> -N-Boc-Cad  | 4.3                      | 45           |

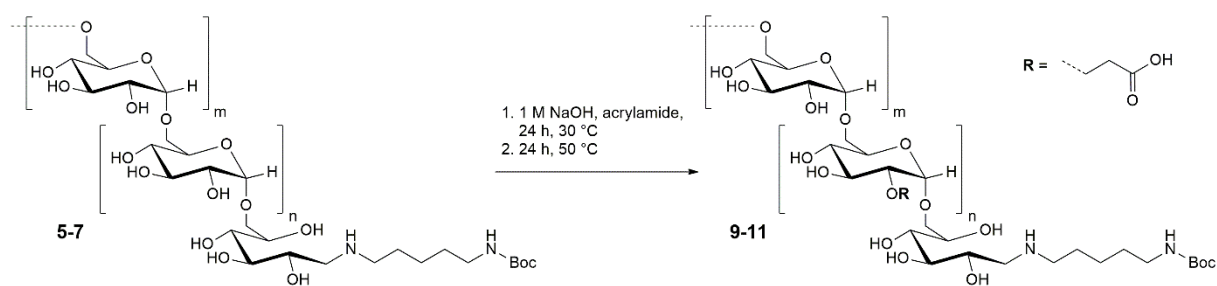

**Scheme S 3.** Carboxyethylation of Dex-N-Boc-Cad to 2-CED-N-Boc-Cad.

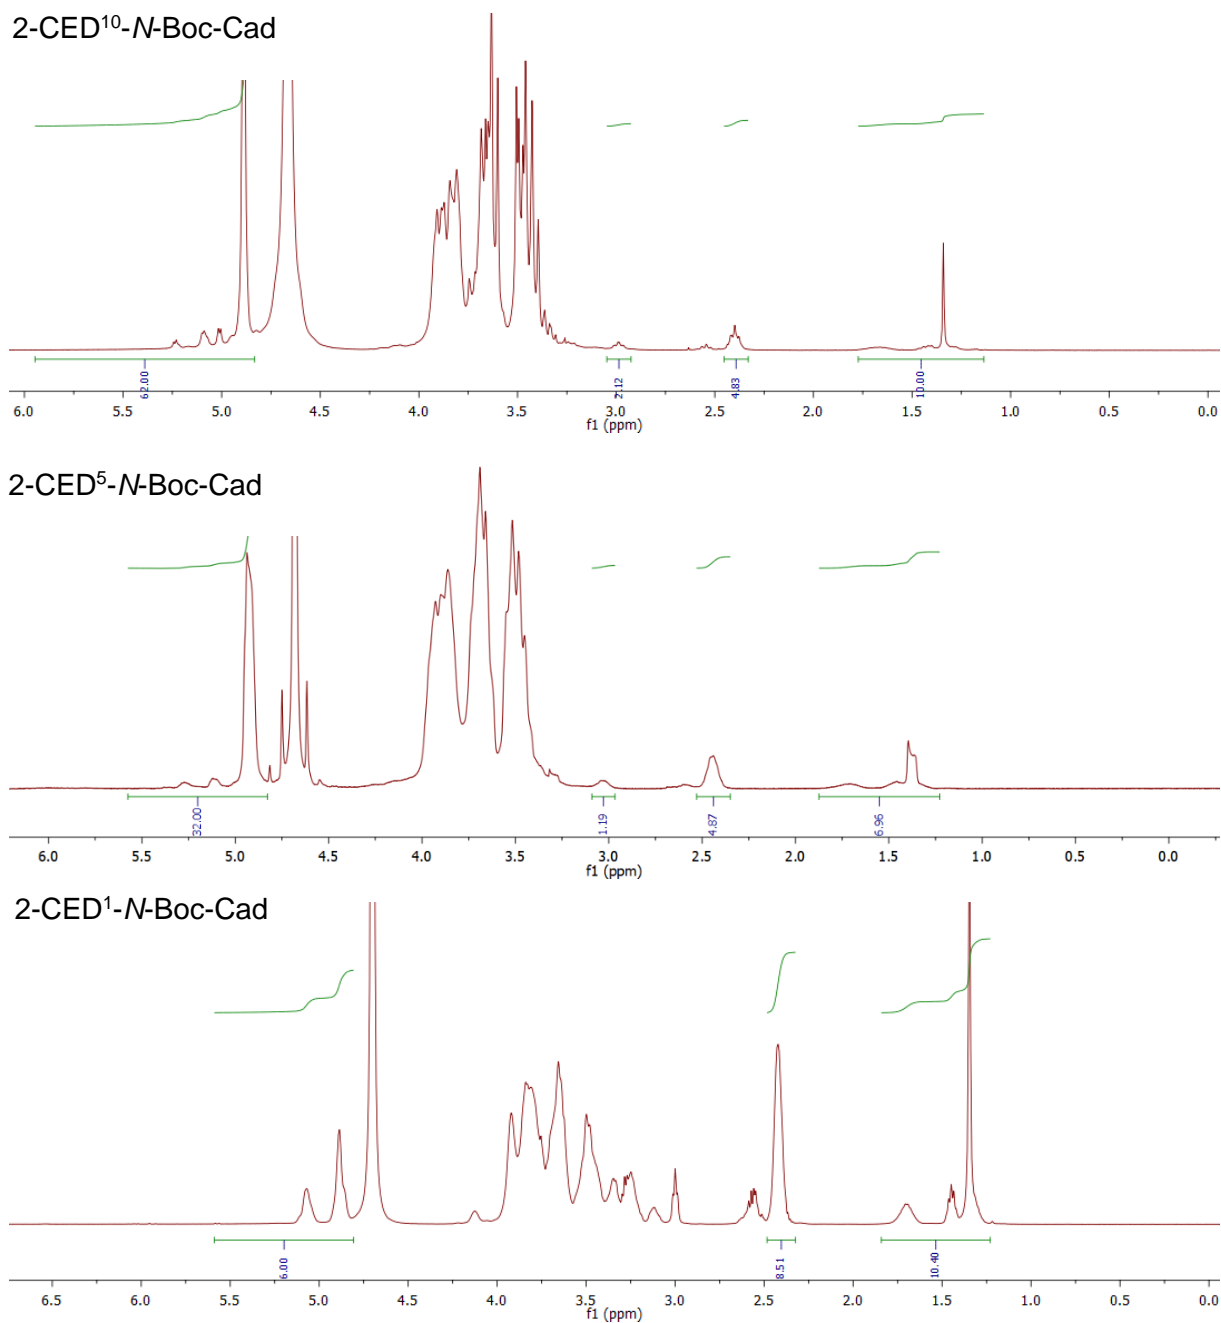

**Figure S 4.** <sup>1</sup>H-NMR spectra of 2-CED<sup>10</sup>-N-Boc-Cad variants. <sup>1</sup>H-NMR of CE-dextrans (300 MHz, D<sub>2</sub>O) δ = 6.09 – 4.79 (m, 1 H, C(1)H), 4.34 – 3.16 (m, C(2-6)H (glucose units); CH<sub>2</sub>CH<sub>2</sub>COOH), 3.14 – 2.91 (m, 4 H, CH<sub>2</sub>NH-Boc, CH<sub>2</sub>(CH<sub>2</sub>)<sub>4</sub>NH-Boc), 2.52 – 2.29 (t, CH<sub>2</sub>COOH), 1.82 – 1.24 (overlapped m, 15 H, CH<sub>2</sub>(CH<sub>2</sub>)<sub>3</sub>NH-Boc, CH<sub>2</sub>(CH<sub>2</sub>)<sub>2</sub>NH-Boc, CH<sub>2</sub>(CH<sub>2</sub>)<sub>1</sub>NH-Boc, 3 CH<sub>3</sub>(Boc)) ppm.

#### 1.4. Synthesis of N<sub>3</sub>-dextran-*N*-Boc-cadaverine

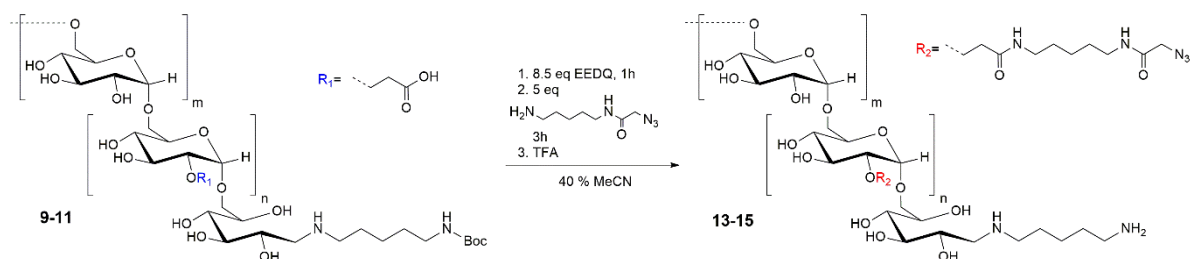

**Scheme S 4.** N<sub>3</sub>-functionalization of 2-CED-*N*-Boc-Cad towards N<sub>3</sub>-Dex-Cad.

**Table S 2.** Yields of N<sub>3</sub>-functionalization of 2-CED-*N*-Boc-Cad with the N<sub>3</sub>-cad-linker and determined number of N<sub>3</sub>-groups per dextran (by <sup>1</sup>H-NMR).

| compound                               | N <sub>3</sub> -groups<br>per dextran | Yield<br>[%] |
|----------------------------------------|---------------------------------------|--------------|
| N <sub>3</sub> -Dex <sup>10</sup> -Cad | 2.4                                   | 70           |
| N <sub>3</sub> -Dex <sup>5</sup> -Cad  | 2.4                                   | 65           |
| N <sub>3</sub> -Dex <sup>1</sup> -Cad  | 4.3                                   | 40           |

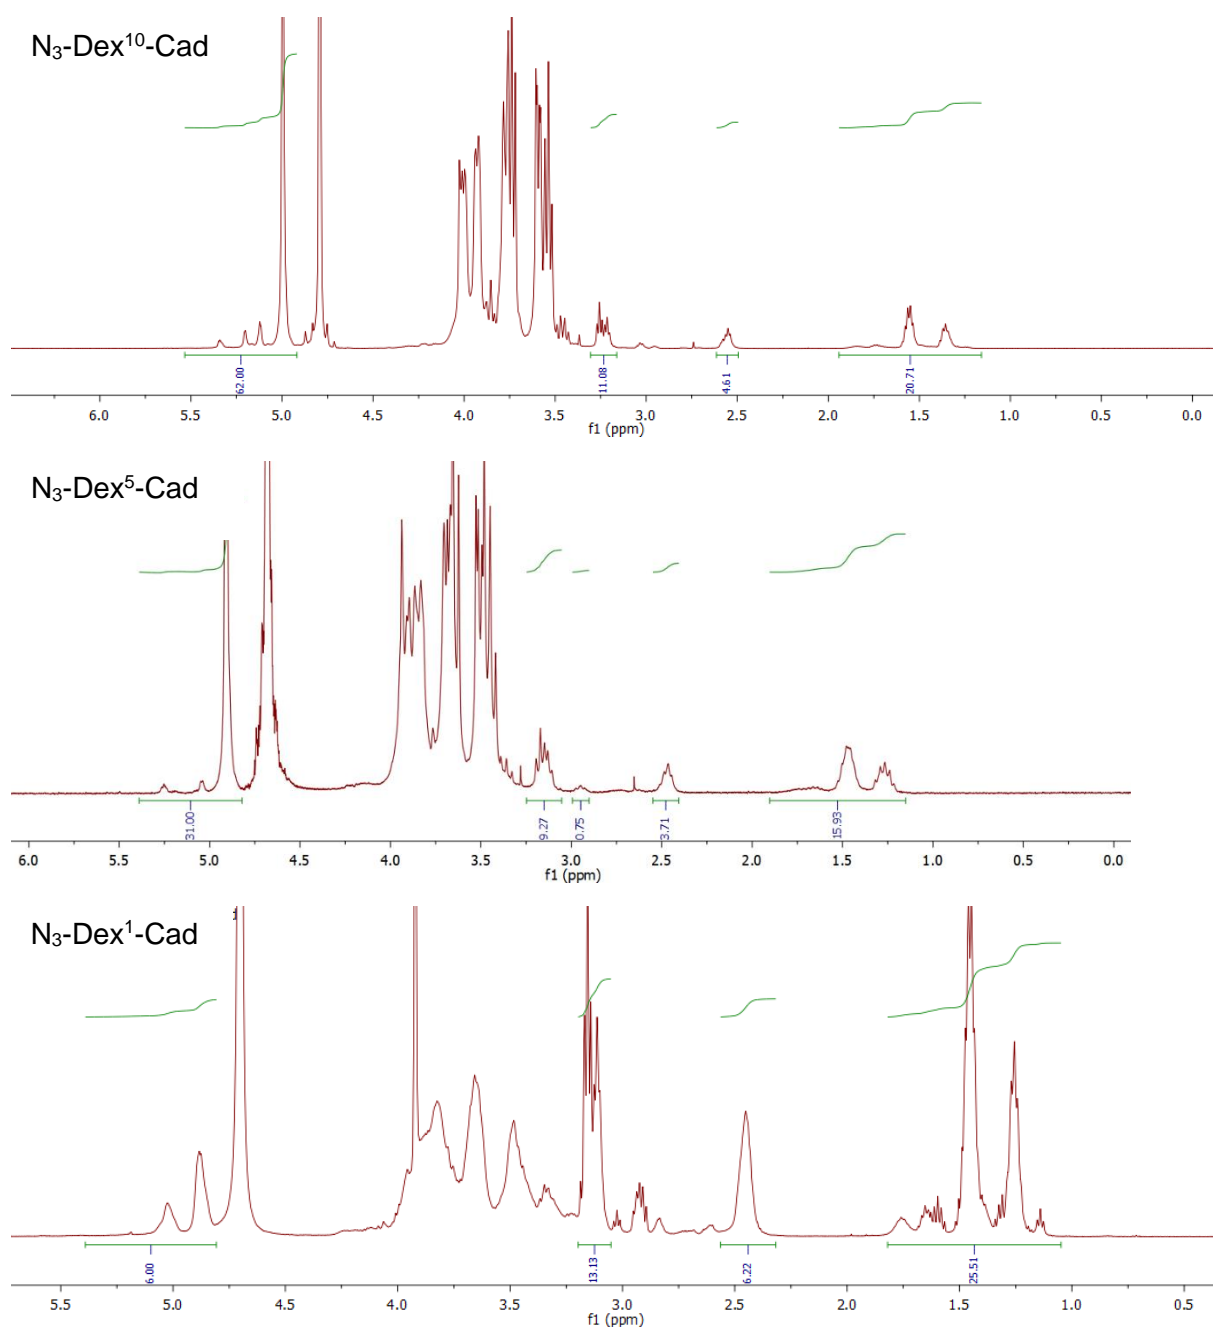

**Figure S 5.** <sup>1</sup>H-NMR spectra of N<sub>3</sub>-Dex-Cad variants. <sup>1</sup>H-NMR (300 MHz, D<sub>2</sub>O) δ = 6.24 – 4.80 (m, 1 H, C(1)H), 4.23 – 3.25 (m, C(2-6)H (glucose units); CH<sub>2</sub>CH<sub>2</sub>COOH; CH<sub>2</sub>-N<sub>3</sub>), 3.23 – 3.07 (m, NHCO-CH<sub>2</sub>-N<sub>3</sub>; CH<sub>2</sub>-(CH<sub>2</sub>)<sub>4</sub>-NHCO-CH<sub>2</sub>-N<sub>3</sub>), 3.07 – 2.96 (m, 4 H, CH<sub>2</sub>NH-BOC, CH<sub>2</sub>(CH<sub>2</sub>)<sub>4</sub>NH-Boc), 2.73 – 2.34 (m, CH<sub>2</sub>COOH), 1.80 – 1.19 (overlapped m, 15 H, CH<sub>2</sub>(CH<sub>2</sub>)<sub>3</sub>NH-Boc, CH<sub>2</sub>(CH<sub>2</sub>)<sub>2</sub>NH-Boc, CH<sub>2</sub>(CH<sub>2</sub>)<sub>1</sub>NH-Boc, 3 CH<sub>3</sub>(BOC); (1.80 – 1.37 CH<sub>2</sub>-CH<sub>2</sub>-NHCO-CH<sub>2</sub>-N<sub>3</sub>, CH<sub>2</sub>-(CH<sub>2</sub>)<sub>3</sub>-NHCO-CH<sub>2</sub>-N<sub>3</sub>, 1.31 – 1.03 CH<sub>2</sub>-(CH<sub>2</sub>)<sub>2</sub>-NHCO-CH<sub>2</sub>-N<sub>3</sub>) ppm.

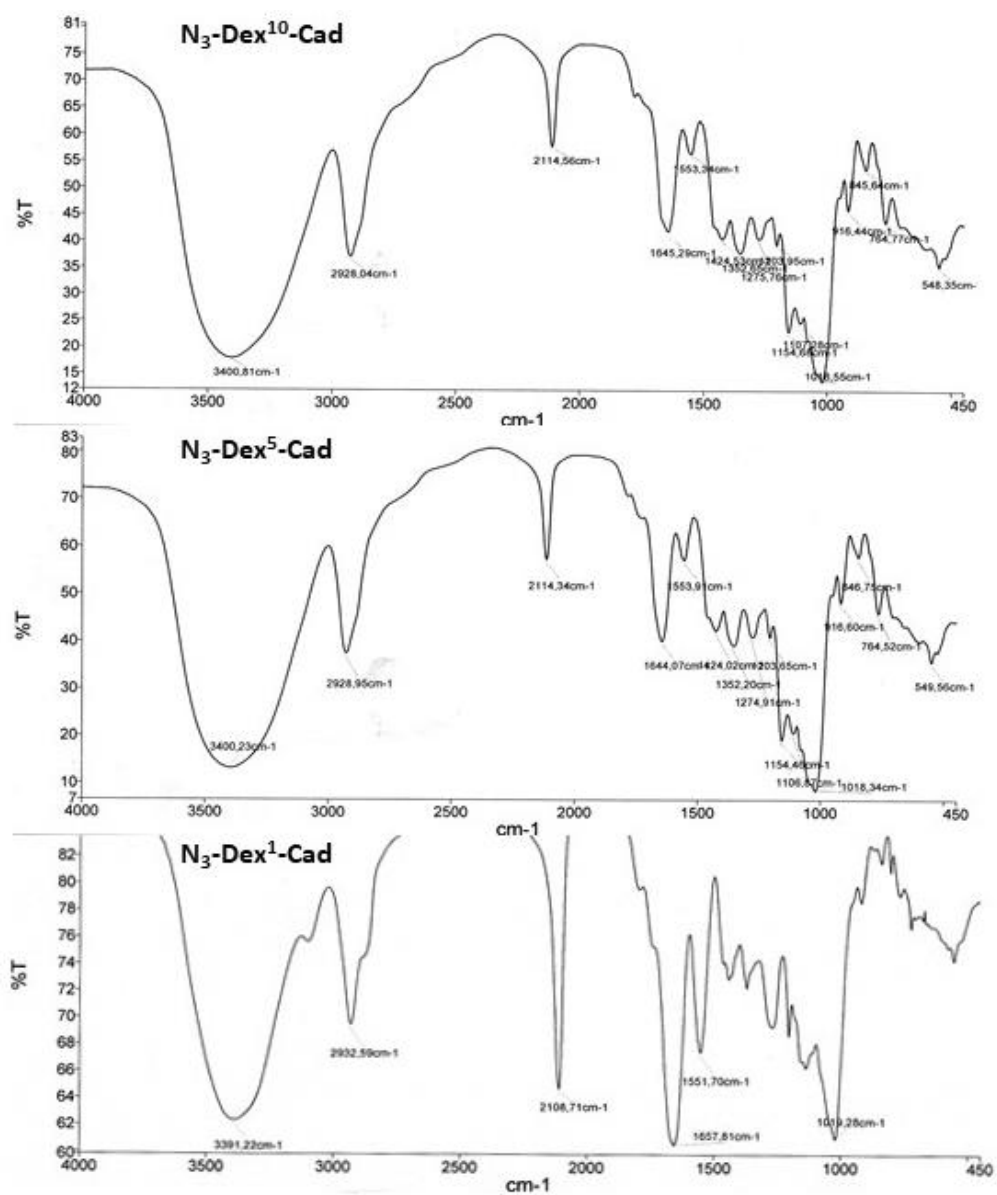

Figure S 6. IR-Spectra of N<sub>3</sub>-Dex<sup>10</sup>-Cad variants. N<sub>3</sub>-stretching vibrational band: 2110 – 2115 cm<sup>-1</sup>.



## 1.5. Synthesis of BCN-IRDye700DX

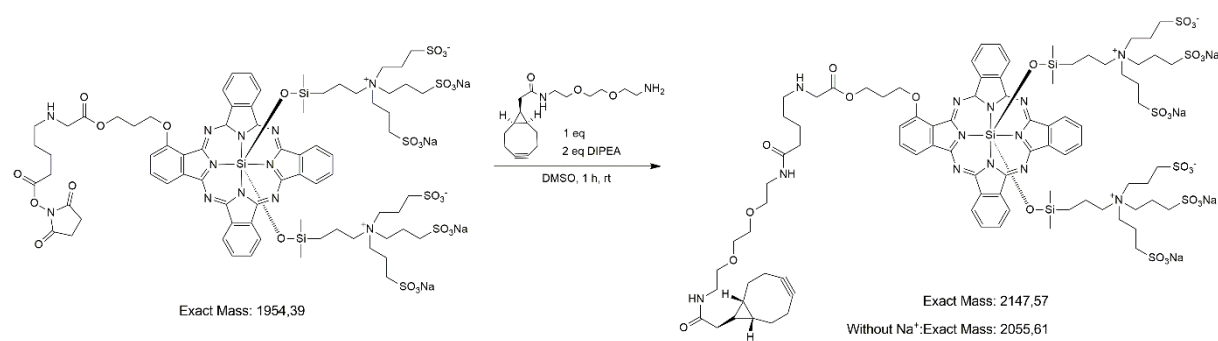

**Scheme S 5** Synthesis of BCN-IRDye700DX.

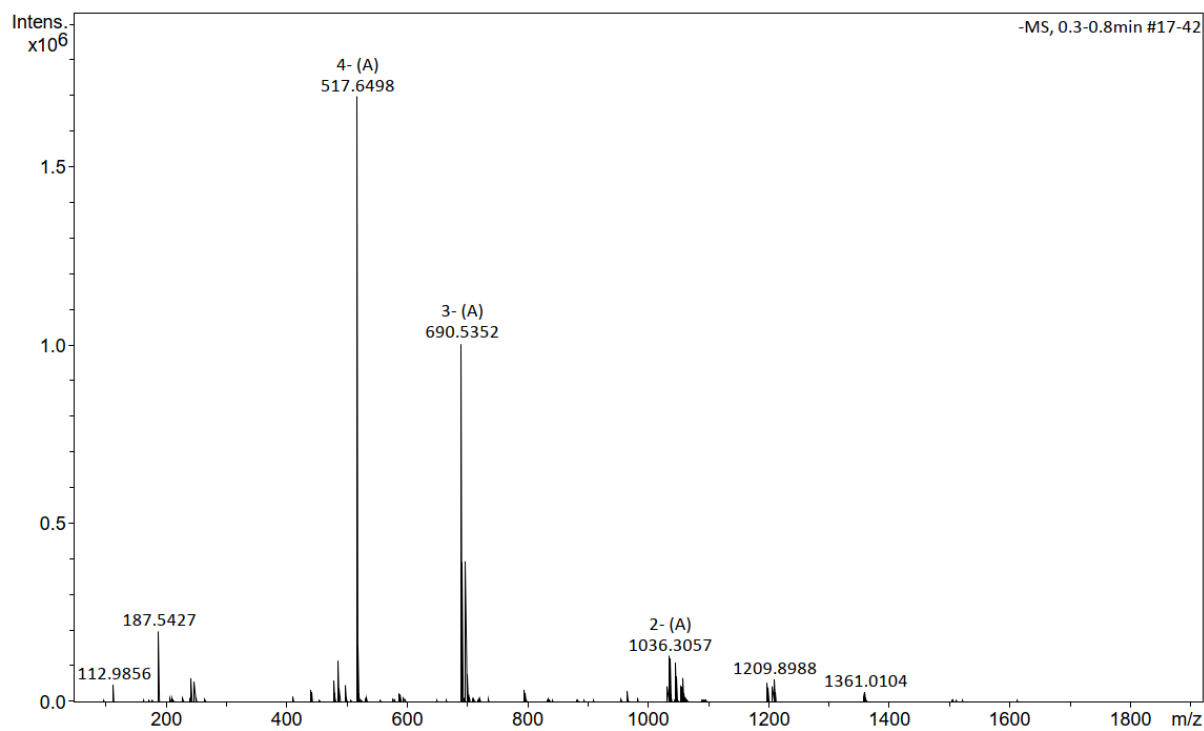

**Figure S 7.** ESI-MS spectrum of BCN-IRDye700DX®.

## 1.6. Structural formulas of utilized labels

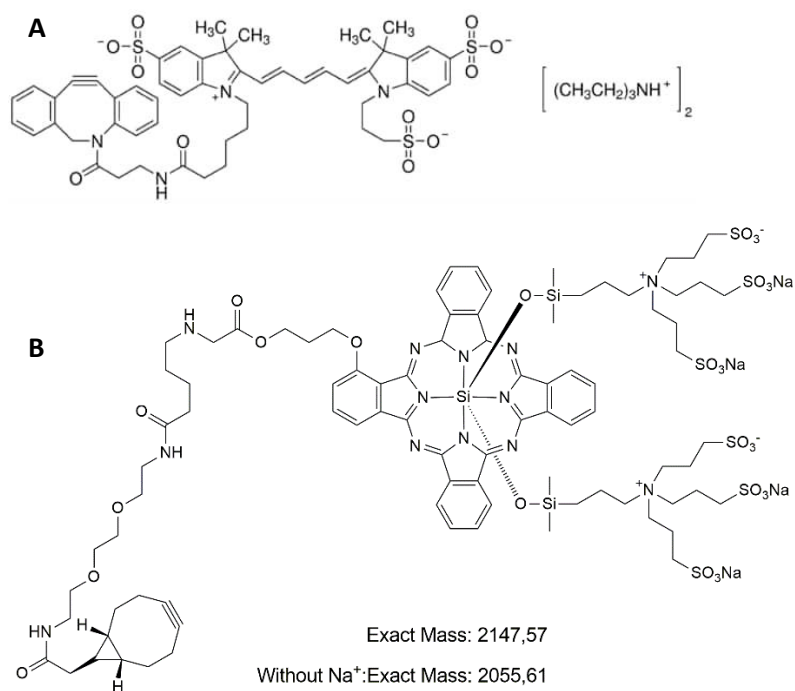

**Scheme S 6.** Utilized labels for SPAAC. **A:** DBCO-Cy5. **B:** BCN-IRsy700DX.

## 1.7. Generation of dextranobios

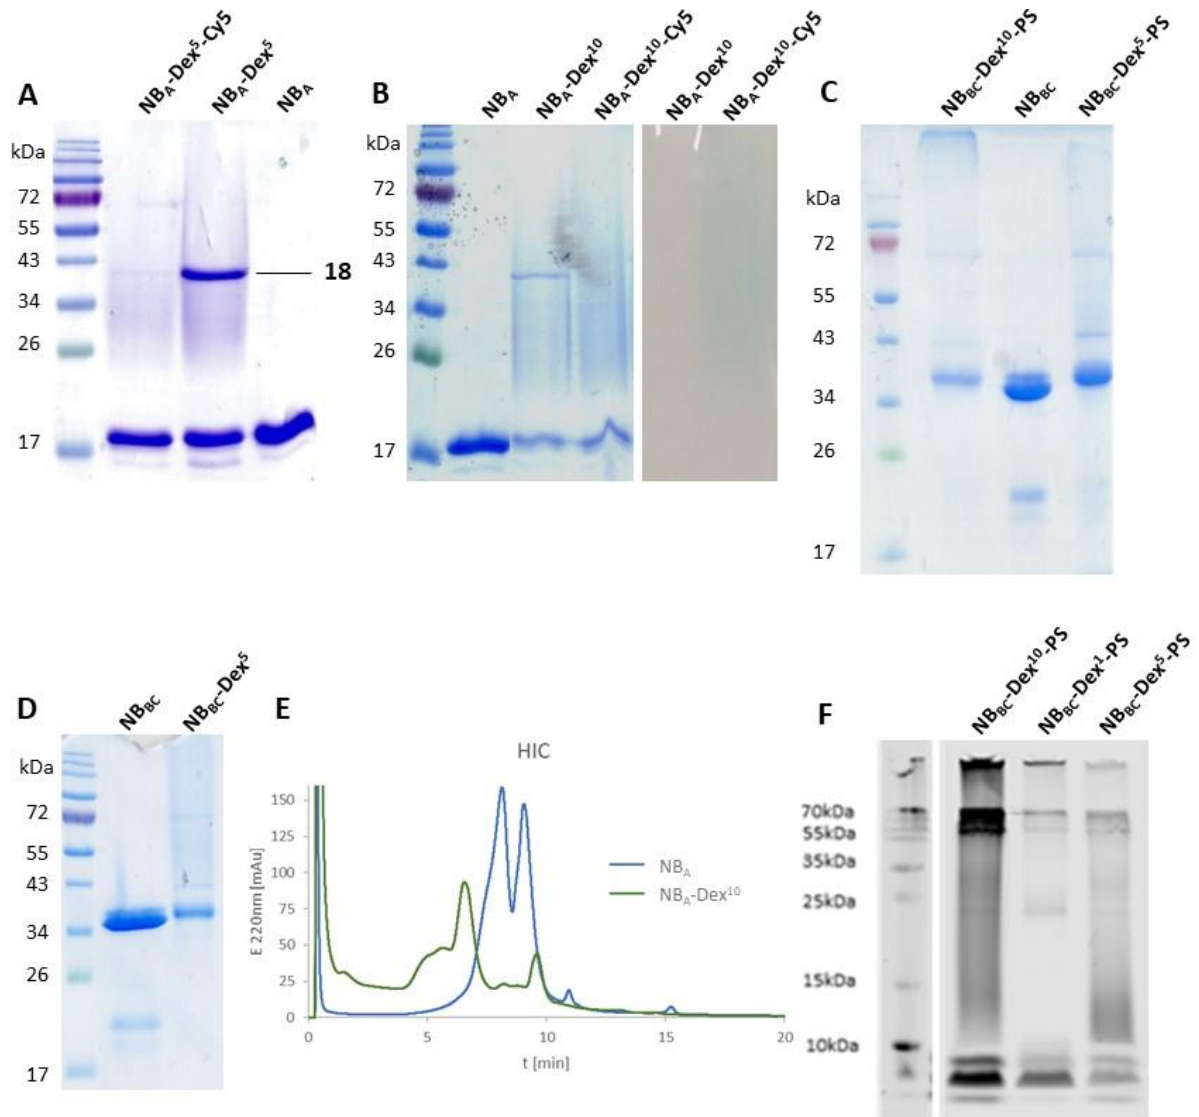

**Figure S 8.** A-D: Coomassie stained SDS-Gels of generated dextranobios. E: HIC chromatogram of NB<sub>A</sub>-Dex<sup>10</sup>. F: SDS-Gel imaged with fluorescence reader (700 nm). Bands show excited IRDye700DX®.

## 2. Supplementary figures cell assays

### 2.1. Cellular binding assays

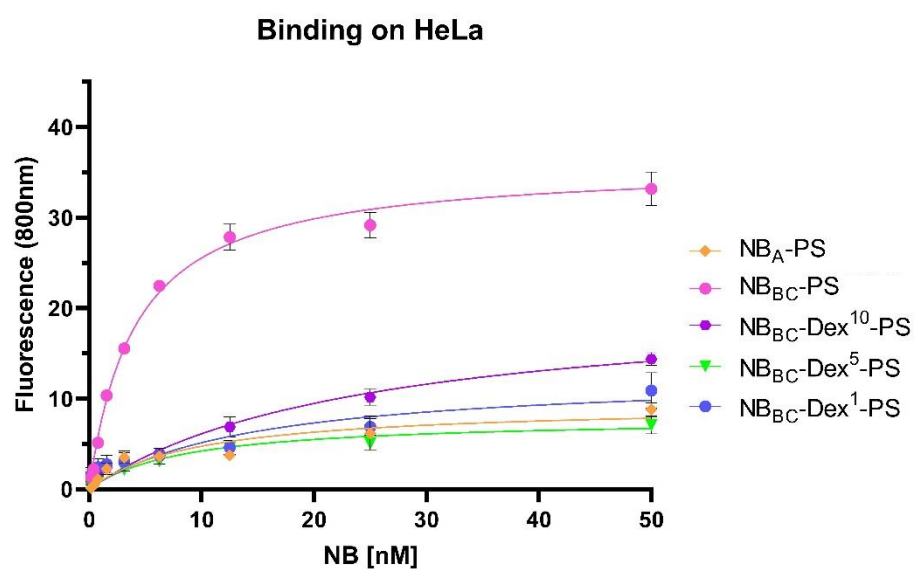

**Figure S 9.** Data of binding assay of NB-PS conjugates on HeLa cell line.

**Table S 3.**  $K_D$ -values of tested conjugates on HeLa cells.

| $K_D$ HeLa [nM]                                 |      |
|-------------------------------------------------|------|
| NB <sub>BC</sub> -Dex <sup>10</sup> -PS DOC 1.2 | 24.3 |
| NB <sub>BC</sub> -Dex <sup>5</sup> -PS DOC 0.7  | 8.7  |
| NB <sub>BC</sub> -Dex <sup>1</sup> -PS DOC 1.1  | 14.8 |
| NB <sub>A</sub> -PS-DOC 0.9                     | 9.7  |
| NB <sub>BC</sub> -PS-DOC 1.5                    | 4.1  |

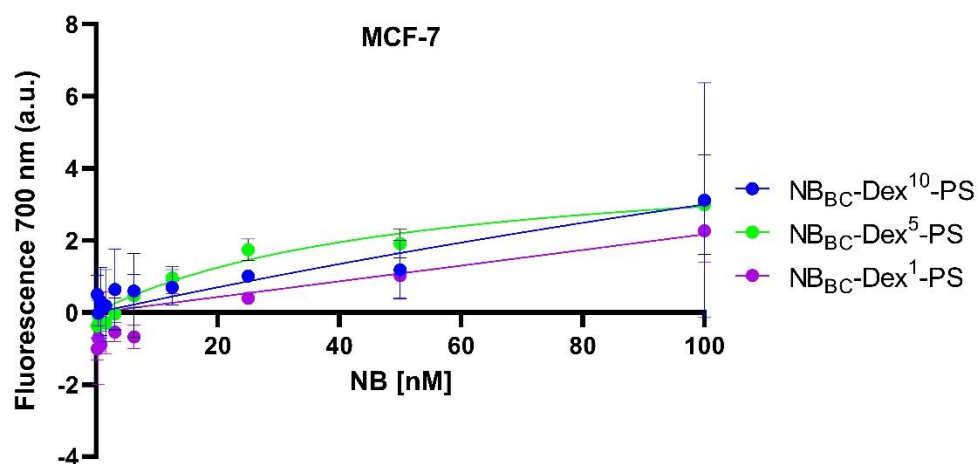

**Figure S 10.** Data of binding assay of NB<sub>BC</sub>-Dex-PS conjugates on MCF-7 cells.

## 2.2. Confocal microscopy of spheroids

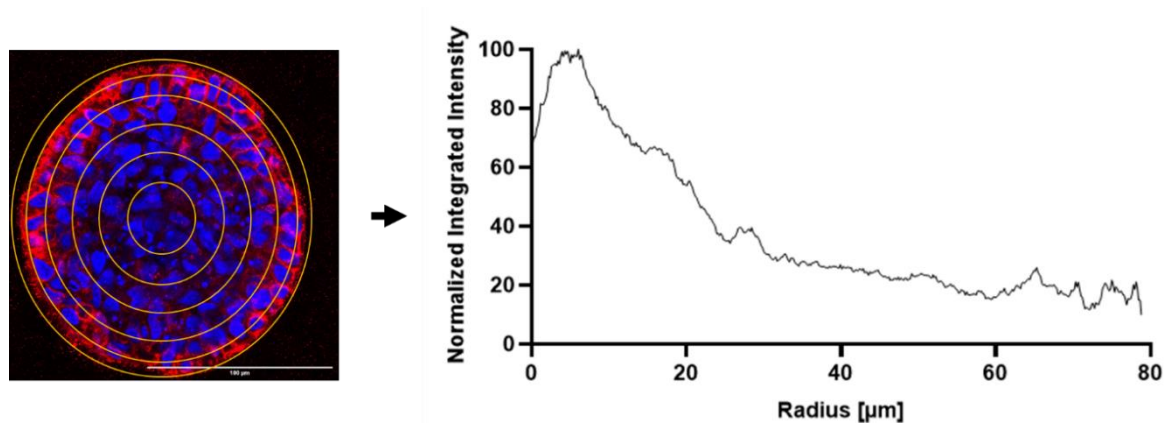

**Figure S 11.** Schematic representation of the analysis of confocal images taken of spheroids using ImageJ radial angle plug-in to create normalized integrated intensity plots of the NB signal along the radius of the spheroids.<sup>7</sup>

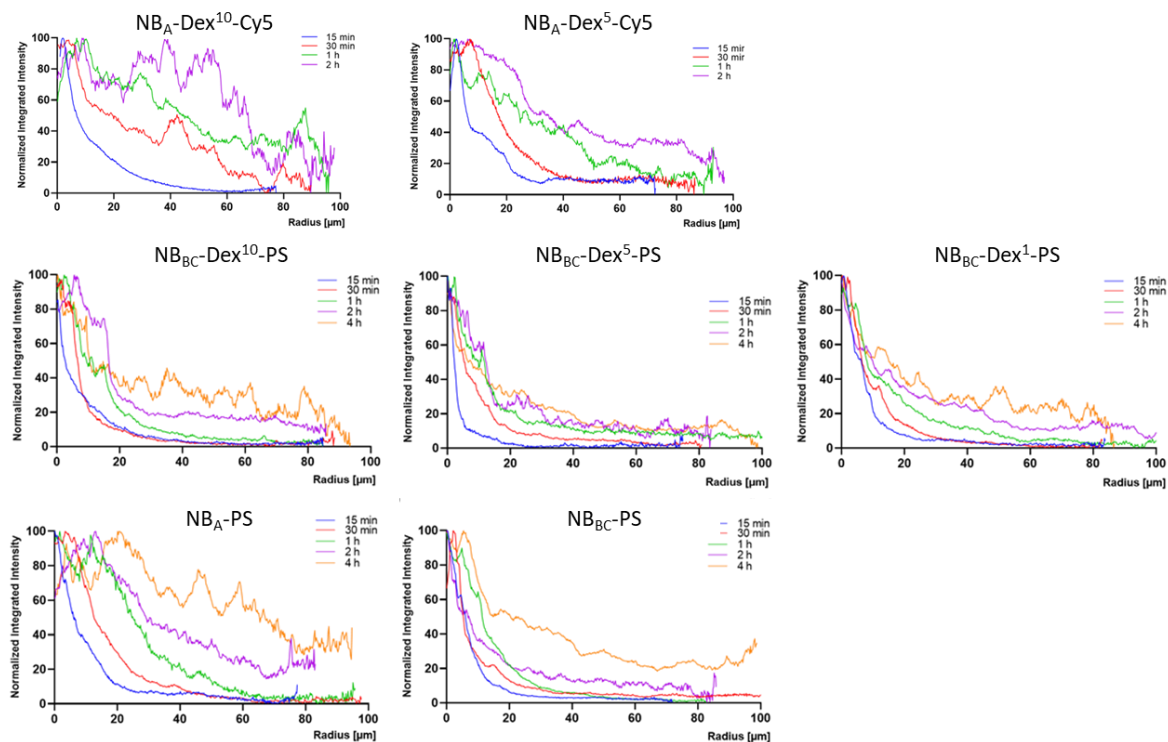

**Figure S 12.** Normalized integrated intensity plots of all conjugates at time points 15 min, 30 min, 1 h and 2 h. PS-conjugates were also measured at 4 h.

### 2.3. Nanobody-targeted photodynamic therapy (in vitro) on 2D monolayer cell culture

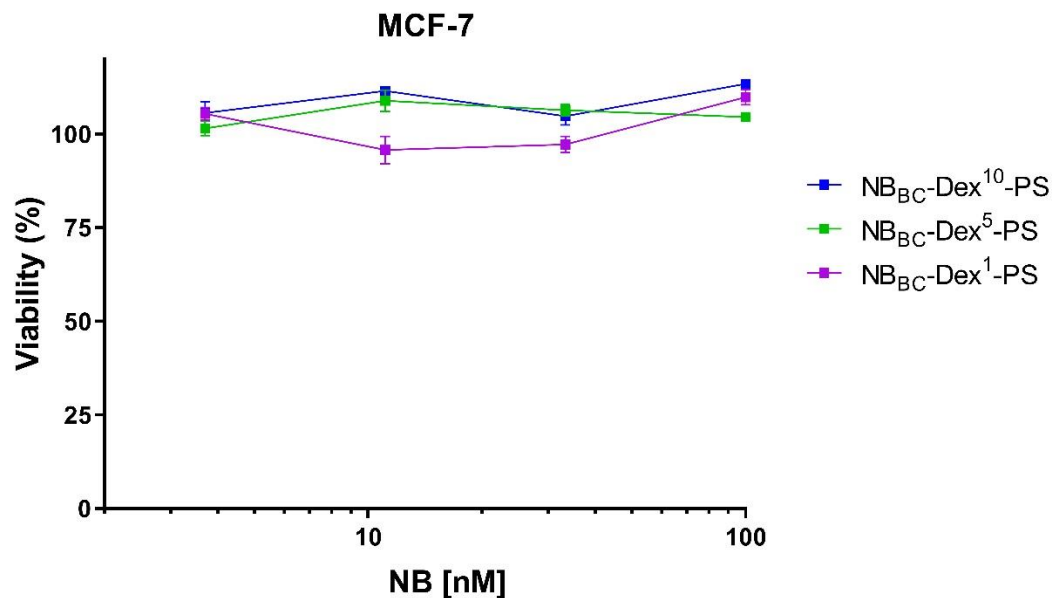

**Figure S 13.** Percentages (%) of cell viability after a 10 J/cm<sup>2</sup> light dose relative to untreated cells.

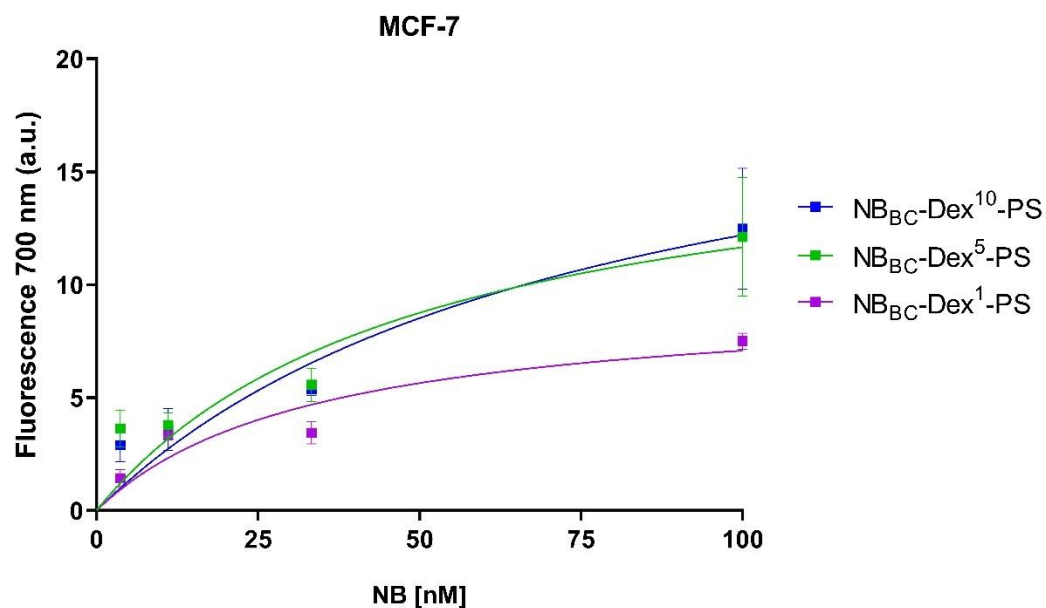

**Figure S 14.** Fluorescence intensities of  $\text{NB}_{\text{BC}}\text{-Dex-PS}$  conjugates bound to cells after 30 min pulse incubation with a concentration range of the conjugates.

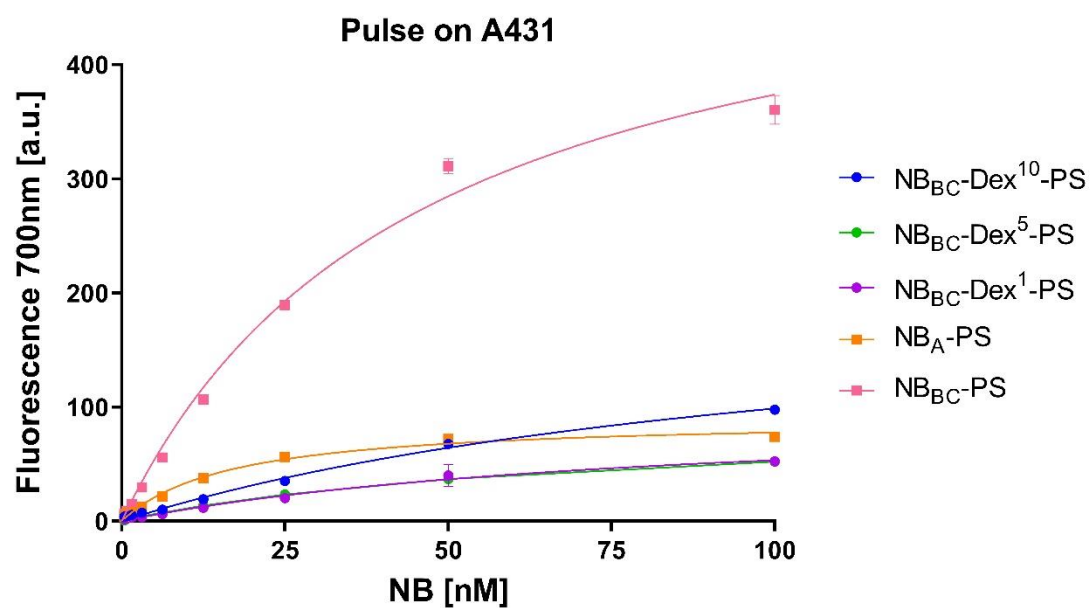

**Figure S 15.** Fluorescence intensities of  $\text{NB-PS}$  conjugates bound to cells after 30 min pulse incubation with a concentration range of the conjugates.

## 2.4. NB-targeted PDT on 3D spheroid cell culture

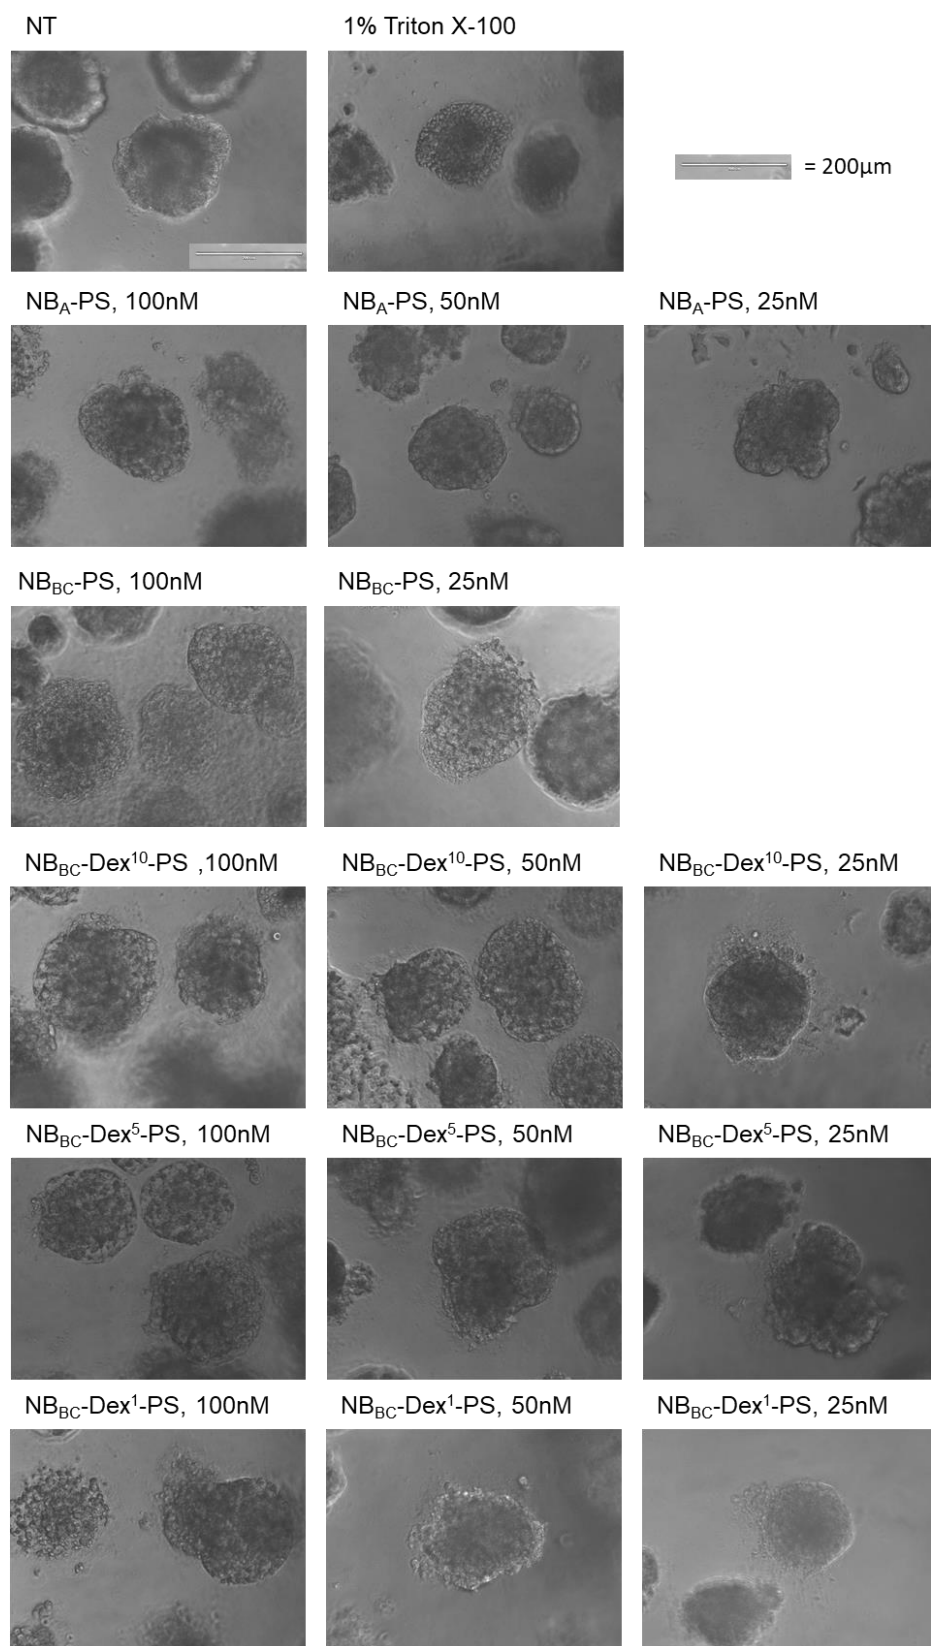

**Figure S 16.** 3D PDT 20J/cm<sup>2</sup>, phase-contrast microscopy images taken 24h post treatment/irradiation.
